# Supplementary material for: Stingless Bee Larvae Require Fungal Steroid to Pupate
Source: PubMed Central journal article supplement (PMC5773678; doi:10.1038/s41598-018-19583-9), 2018-01-18
Supplement: 41598_2018_19583_MOESM1_ESM.pdf [file 41598_2018_19583_MOESM1_ESM.pdf]

## ***Supplementary Information***

### **Stingless Bee Larvae Require Fungal Steroid to Pupate**

Camila R. Paludo<sup>1</sup>, Cristiano Menezes<sup>2,3</sup>, Eduardo A. Silva-Junior<sup>1</sup>, Ayrton Vollet-Neto<sup>3</sup>, Andres Andrade-Dominguez<sup>4</sup>, Gleb Pishchany<sup>4</sup>, Lily Khadempour<sup>5,6</sup>, Fabio S. do Nascimento<sup>3</sup>, Cameron R. Currie<sup>5</sup>, Roberto Kolter<sup>4</sup>, Jon Clardy<sup>7\*</sup>, Mônica T. Pupo<sup>1\*</sup>

<sup>1</sup>School of Pharmaceutical Sciences of Ribeirão Preto, University of São Paulo, Ribeirão Preto, São Paulo, 14040-903, Brazil;

<sup>2</sup>Brazilian Agricultural Research Corporation, Embrapa Amazônia Oriental, Belém, 66095-100, Brazil;

<sup>3</sup>Department of Biology, FFCLRP, University of São Paulo, Ribeirão Preto, São Paulo, 14040-901, Brazil;

<sup>4</sup>Department of Microbiology and Immunobiology, Harvard Medical School, Boston, Massachusetts, MA 02115, USA;

<sup>5</sup>Department of Bacteriology, University of Wisconsin, Madison, Wisconsin, WI 53706, USA;

<sup>6</sup>Department of Zoology, University of Wisconsin, Madison, Wisconsin, WI 53706, USA;

<sup>7</sup>Department of Biological Chemistry and Molecular Pharmacology, Harvard Medical School, Boston, Massachusetts, MA 02115, USA.

\*Correspondence and requests for materials should be addressed to JC (email: jon\_clardy@hms.harvard.edu) or MTP (email: mtpupo@fcfrp.usp.br).

## Supplementary Figures:

**Figure 1. Characterization of the microorganism eaten by *S. depilis* larvae.** (a) Phylogenetic tree of 18S rRNA of the white fungus collected directly from *S. depilis* brood cells (KX999556), *Zygosaccharomyces* sp. SDBC30G1 (KX999554) and *Monascus ruber* SDCP1 (KX999557), using NS1 and NS4 primers. (b) Agarose gel electrophoresis of amplicons from 18S region of *Zygosaccharomyces* sp. SDBC30G1 (Z), white fungus collected directly from *S. depilis* brood cells (WF) and *Monascus ruber* SDCP1 (M) using specific primers to *Zygosaccharomyces* sp. SDBC30G1 (18S - Z) and specific primers to *M. ruber* SDCP1 (18S - M).

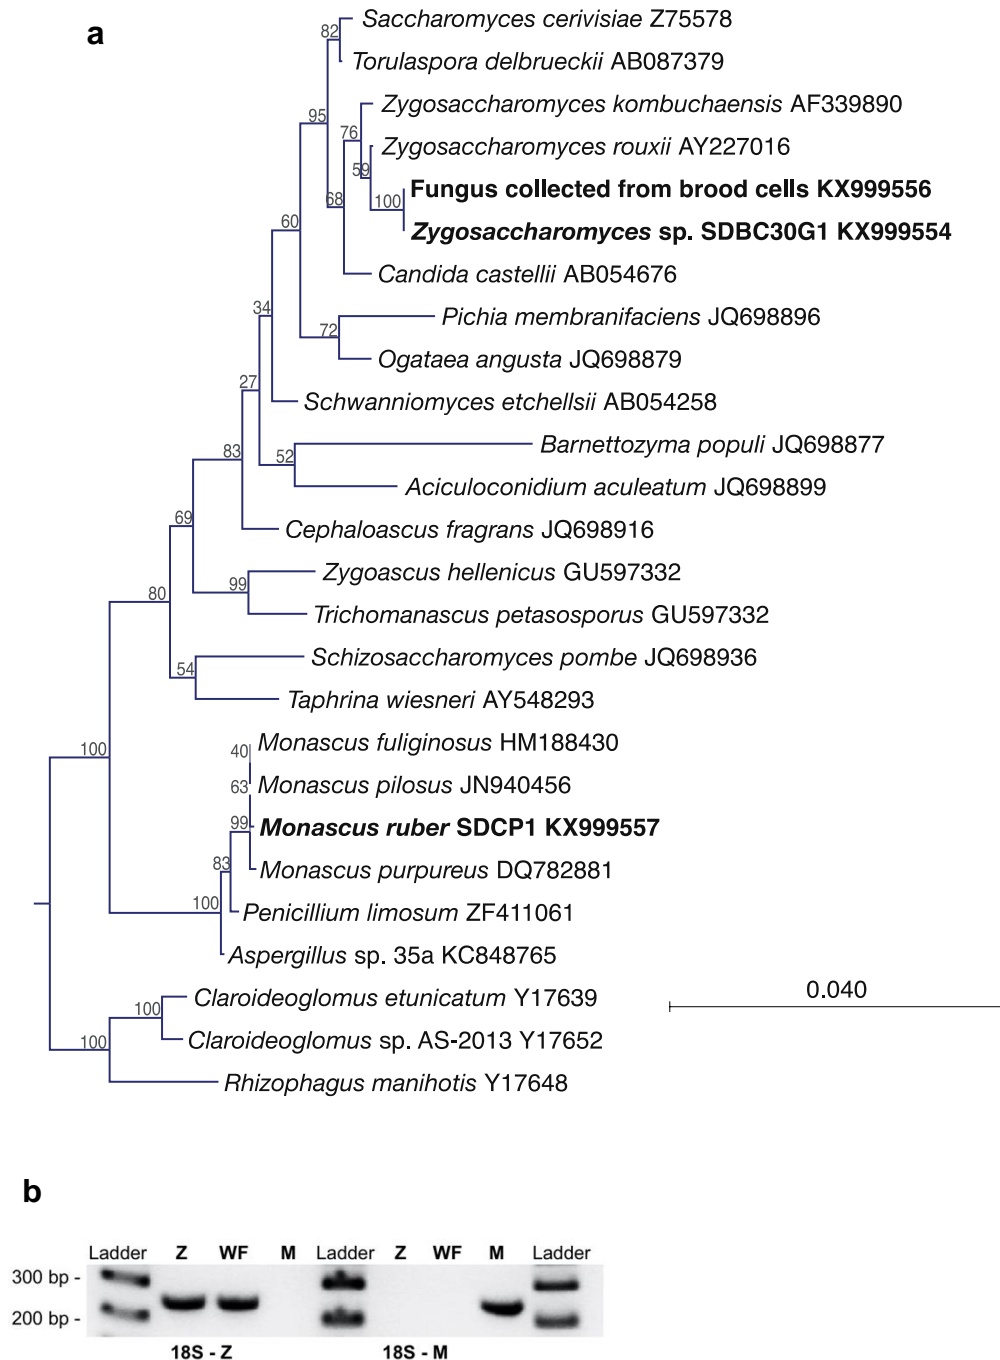

**Figure 2.** Larval *in vitro* culturing assay using eggs from three different *S. depilis* colonies. **(a)** Larvae reared without fungus inoculation. **(b)** Larvae reared with fungus collected directly from *S. depilis* brood cells. **(c)** Larvae reared with *Zygosaccharomyces* sp. SDBC30G1. # Problem with egg hatching. X Pupation failed.

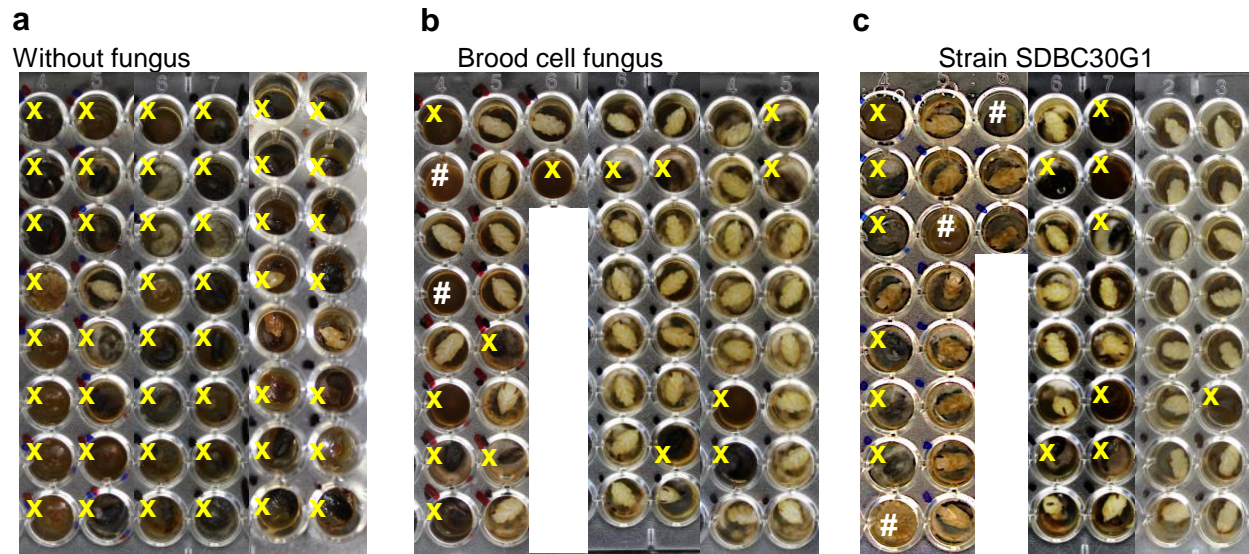

**Figure 3.** (a) GC-MS analysis of *Zygosaccharomyces* sp. SDBC30G1 sterols. (b) Identification of ergosterol (30.58 min) using *NIST 11*. Fatty acids detected around 20 min.

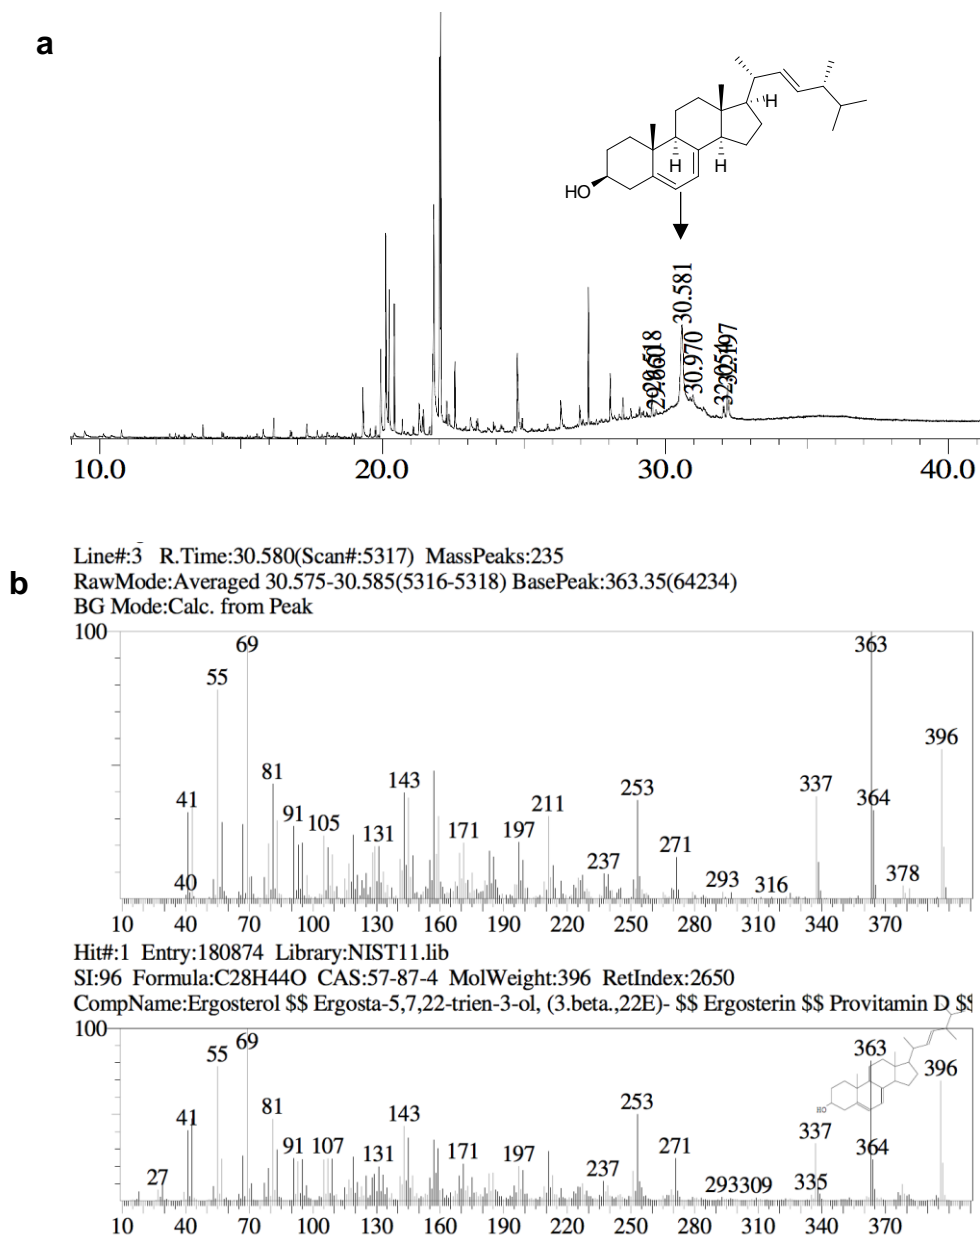

**Figure 4. Larval *in vitro* culturing assay using eggs from three different *S. depilis* colonies. (a)** Larvae reared without fungus or sterol inoculation. **(b)** Larvae reared with fungus collected directly from *S. depilis* brood cells. **(c)** Larvae reared with ergosterol at 2.5  $\mu\text{M}$  in the larval food. X Pupation failed.

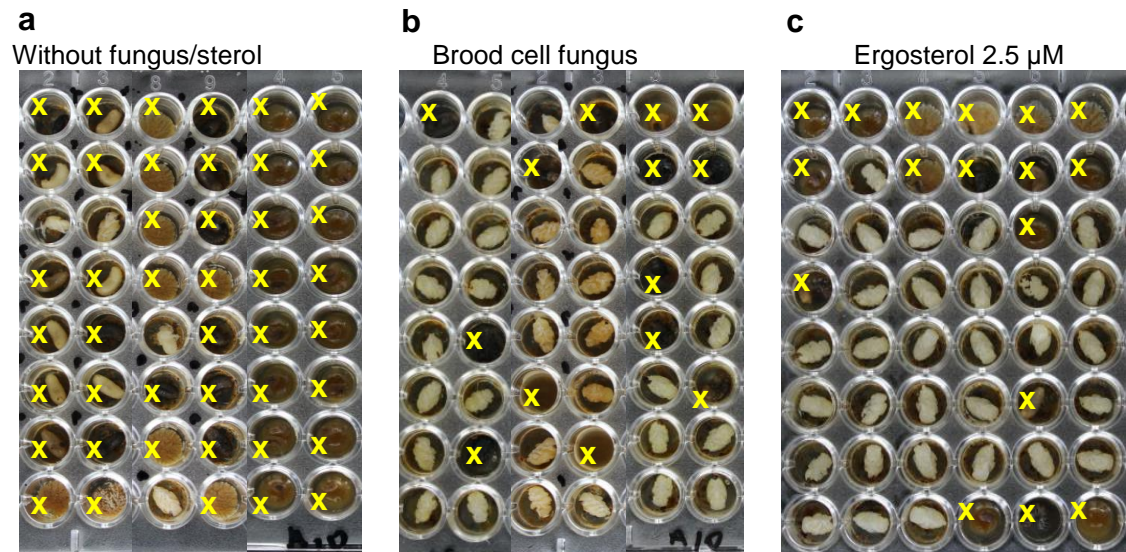

**Figure 5.** (a) Extracted ion chromatogram of *S. depilis* pupae extracts from three different colonies ( $m/z$  495.3316). (b) HRESIMS of MaA or epi-MaA ( $m/z$  495.3314,  $C_{28}H_{47}O_7$   $[M+H]^+$ , error 0.5 ppm). (c) MS/MS of *S. depilis* pupae MaA or epi-MaA.

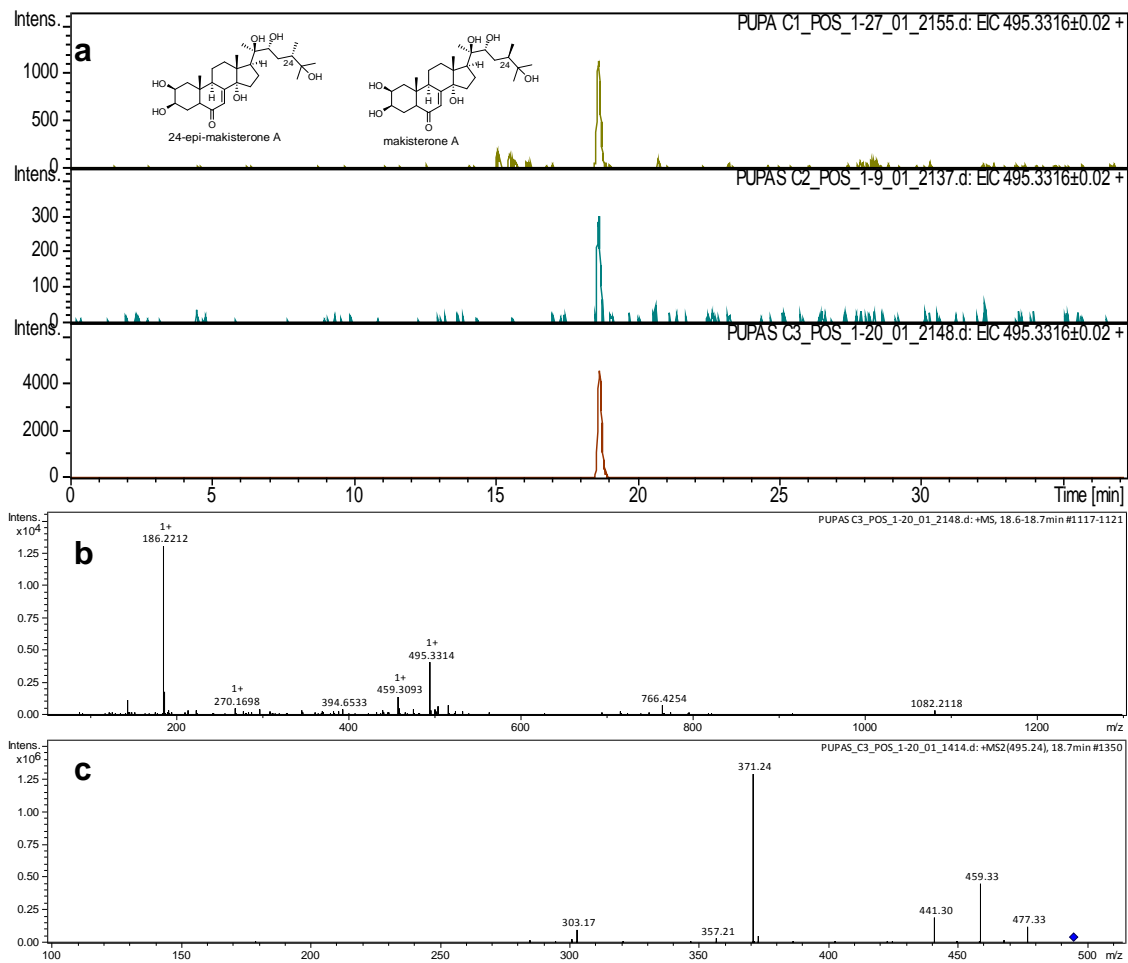

**Figure 6. Extracted ion chromatogram from *S. depilis* pupae extract (a)  $m/z$  495.3316 for MaA or epi-MaA. (b)  $m/z$  493.3159 for dhMaA. (c)  $m/z$  481.3159 for 20E. (d)  $m/z$  465.3210 for ecdysone.**

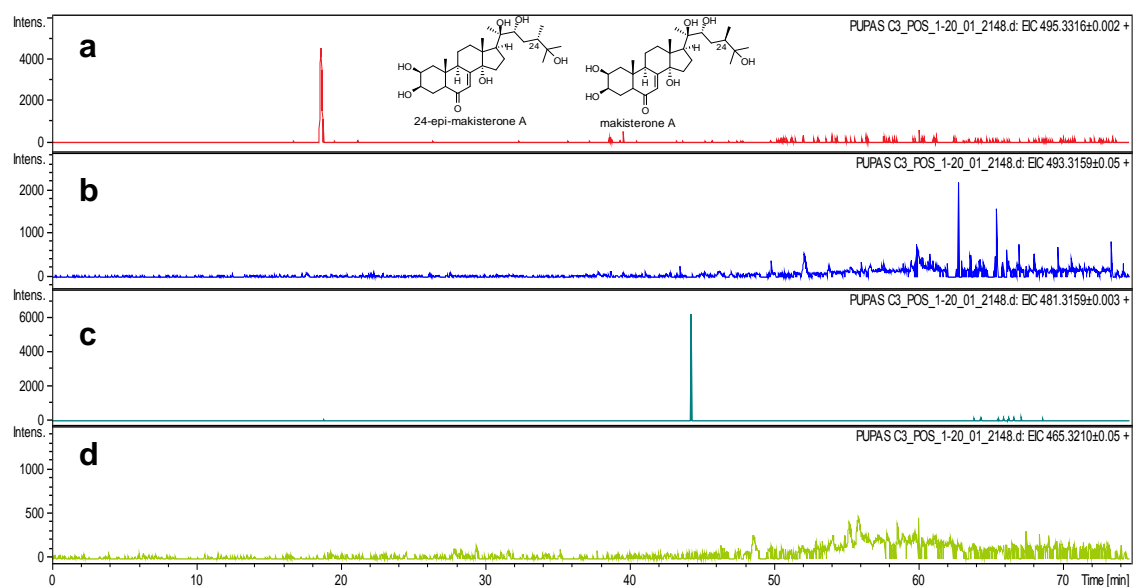

## Supplementary table

**Table S1.** Specific primers for 18S region of *Zygosaccharomyces* sp. SDBC30G1 and *M. ruber* SDCP1.

| Microorganism                         | Designed primer                                                      |
|---------------------------------------|----------------------------------------------------------------------|
| <i>Zygosaccharomyces</i> sp. SDBC30G1 | FMZ 5'-GCATGGAATAATAGAATAGGACG-3'<br>RZ 5'-TGGGTCAGTAAATAAACACCAC-3' |
| <i>Monascus ruber</i> SDCP1           | FMZ 5'-GCATGGAATAATAGAATAGGACG-3'<br>RM 5'-GGTCATCATAGAAACCCGT-3'    |

## Supplementary movie

**Movie S1.** Time lapse of the flotation phenomenon of *Zygosaccharomyces* sp. SDBC30G1 cells in 15GF broth, pH 4.5.
